# Supplementary material for: Syntheses, structural diversities and characterization of a series of coordination polymers with two isomeric oxadiazol-pyridine ligands
Source: Royal Society of Chemistry journal article supplement (doi:10.1039/c6ra28153b), 2017-01-01
Supplement: c6ra28153b1.pdf [file c6ra28153b1.pdf]

## *Supporting information*

### **Syntheses, Structural Diversities and Characterization of A Series of Coordination Polymers with Two Isomeric Oxadiazol-pyridine Ligands**

Bin Ding<sup>a,b\*</sup>, Jie Wu<sup>a,b</sup>, Xiang Xia Wu<sup>a,b</sup>, Jian Zhong Huo<sup>a,b</sup>, Zhao Zhou Zhu<sup>a,b</sup>, Yuan Yuan Liu<sup>a,b</sup>, and Fang Xue Shi<sup>a,b</sup>

<sup>a</sup>Key Laboratory of Inorganic-Organic Hybrid Functional Material Chemistry (Tianjin Normal University), Ministry of Education, Tianjin Key Laboratory of Structure and Performance for Functional Molecule, College of Chemistry, Tianjin Normal University, 393 Binshui West Road, Tianjin 300387, PR China

<sup>b</sup>Key Laboratory of Advanced Energy Materials Chemistry (Ministry of Education), Collaborative Innovation Center of Chemical Science and Engineering (Tianjin), College of Chemistry, Nankai University, Tianjin 300071, China

\*To whom correspondence should be addressed.

E-mail: hxxymb@mail.tjnu.edu.cn Received Date (automatically inserted by publisher)

Table S1. Selected hydrogen bonds lengths [Å] and angles [°] for **1-8**.

| D-H...A            | d(D-H) | d(H...A) | d(D...A)  | <(DHA) |
|--------------------|--------|----------|-----------|--------|
| <b>1</b>           |        |          |           |        |
| C(4)-H(4)···N(4)   | 0.93   | 2.52     | 3.448(6)  | 174    |
| C(8)-H(8B)···S(1)  | 0.96   | 2.85     | 3.652(5)  | 142    |
| <b>2</b>           |        |          |           |        |
| O(2)-H(2A)···O(3)  | 0.87   | 1.89     | 2.740(4)  | 166    |
| O(2)-H(2B)···N(3)  | 0.89   | 2.01     | 2.854(4)  | 160    |
| O(3)-H(3A)···O(2)  | 0.86   | 2.29     | 2.965(4)  | 136    |
| O(3)-H(3B)···N(8)  | 0.87   | 2.12     | 2.970(6)  | 165    |
| <b>3</b>           |        |          |           |        |
| C(1)-H(1)···N(2)   | 0.93   | 2.59     | 3.304(3)  | 134    |
| <b>4</b>           |        |          |           |        |
| C(8)-H(8B)···F(12) | 0.96   | 2.48     | 3.341(9)  | 149    |
| C(17)-H(17)···F(7) | 0.93   | 2.42     | 3.190(10) | 140    |
| C(17)-H(17)···F(8) | 0.93   | 2.55     | 3.347(10) | 144    |

|                     |      |      |          |     |
|---------------------|------|------|----------|-----|
| C(21)-H(21)···N(5)  | 0.93 | 2.62 | 3.504(8) | 159 |
| <b>5</b>            |      |      |          |     |
| C(1)-H(1A)···O(13)  | 0.96 | 2.43 | 3.348(7) | 160 |
| C(4)-H(4)···N(2)    | 0.93 | 2.42 | 3.259(6) | 150 |
| C(12)-H(12)···N(5)  | 0.93 | 2.40 | 3.241(6) | 150 |
| C(15)-H(15)···O(11) | 0.93 | 2.58 | 3.393(7) | 146 |
| <b>6</b>            |      |      |          |     |
| C(1)-H(1)···N(3)    | 0.93 | 2.60 | 3.528(4) | 173 |
| <b>7</b>            |      |      |          |     |
| C(2)-H(2C)···F(1)   | 0.96 | 2.53 | 3.338(5) | 142 |
| C(6)-H(6)···O(4)    | 0.93 | 2.56 | 3.308    | 138 |
| <b>8</b>            |      |      |          |     |
| C(4)-H(4)···F(2)    | 0.93 | 2.38 | 3.085(9) | 132 |

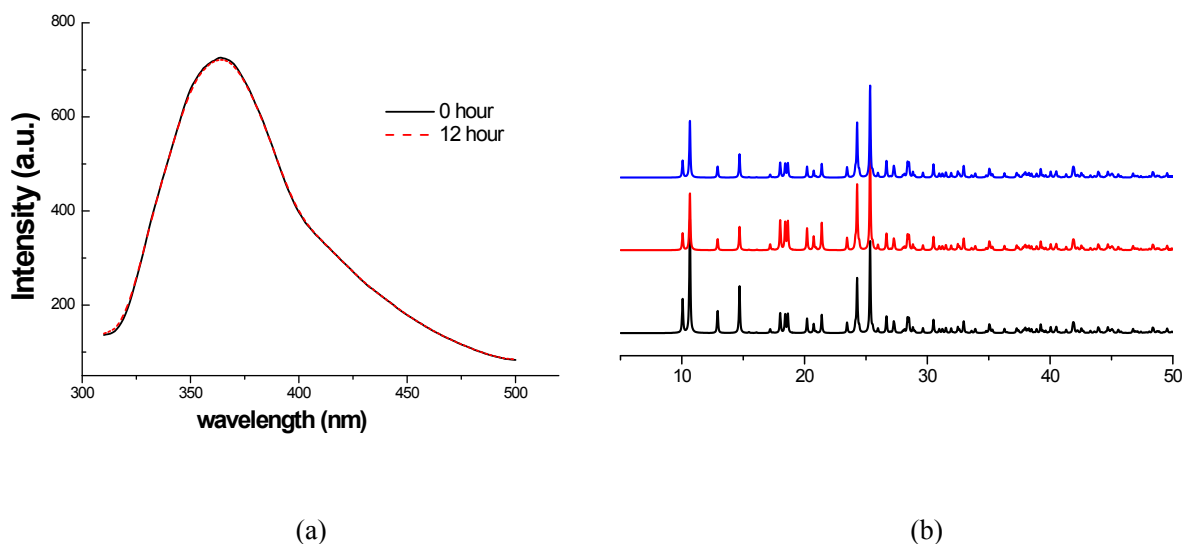

Figure S1. (a) Fluorescent spectra of complex **8** immersed into the water solutions as the suspensions for 0 h and after 12 h. (b) Powder X-ray diffraction (PXRD) patterns of **8** (black for calculated, red for experimental ones, and blue for the samples of **8** immersed into aqueous solutions for 12 h).
